# Supplementary material for: Activation of transient receptor potential vanilloid 4 protects articular cartilage against inflammatory responses via CaMKK/AMPK/NF-κB signaling pathway
Source: PubMed Central journal article supplement (PMC8324869; doi:10.1038/s41598-021-94938-3), 2021-07-30
Supplement: 41598_2021_94938_MOESM1_ESM.pdf [file 41598_2021_94938_MOESM1_ESM.pdf]

# Supplementary data 1

## Expression of MMP-13 in HACs in the Figure 2b

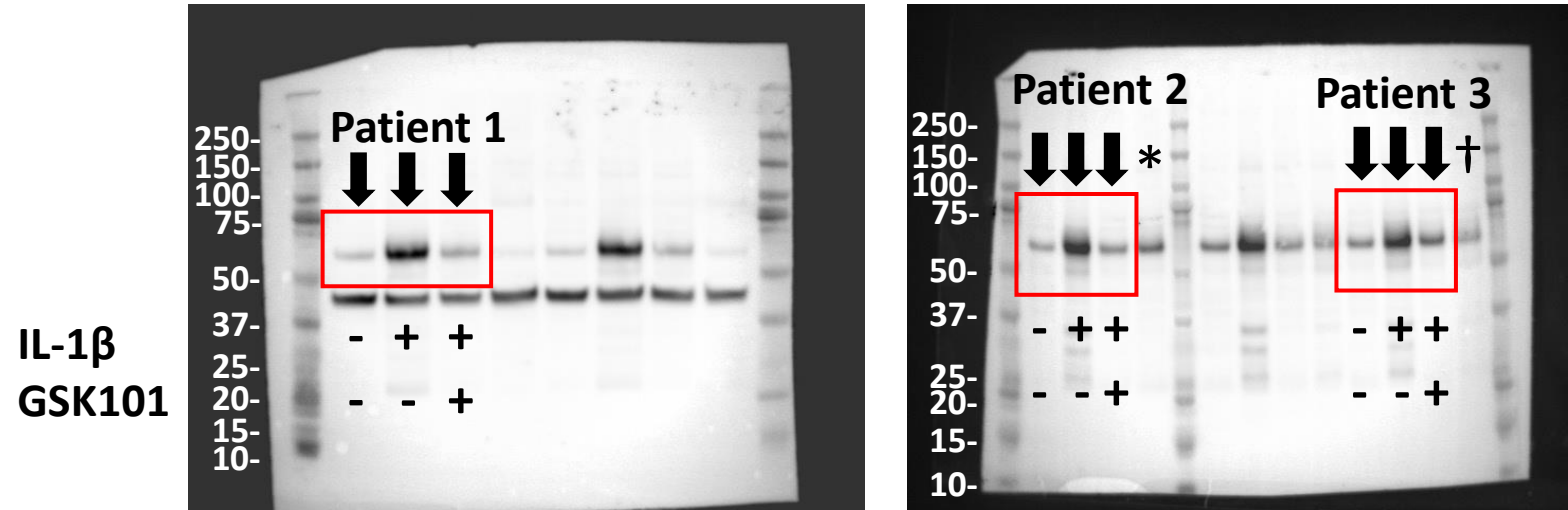

## Expression of $\beta$ -actin in HACs in the Figure 2b

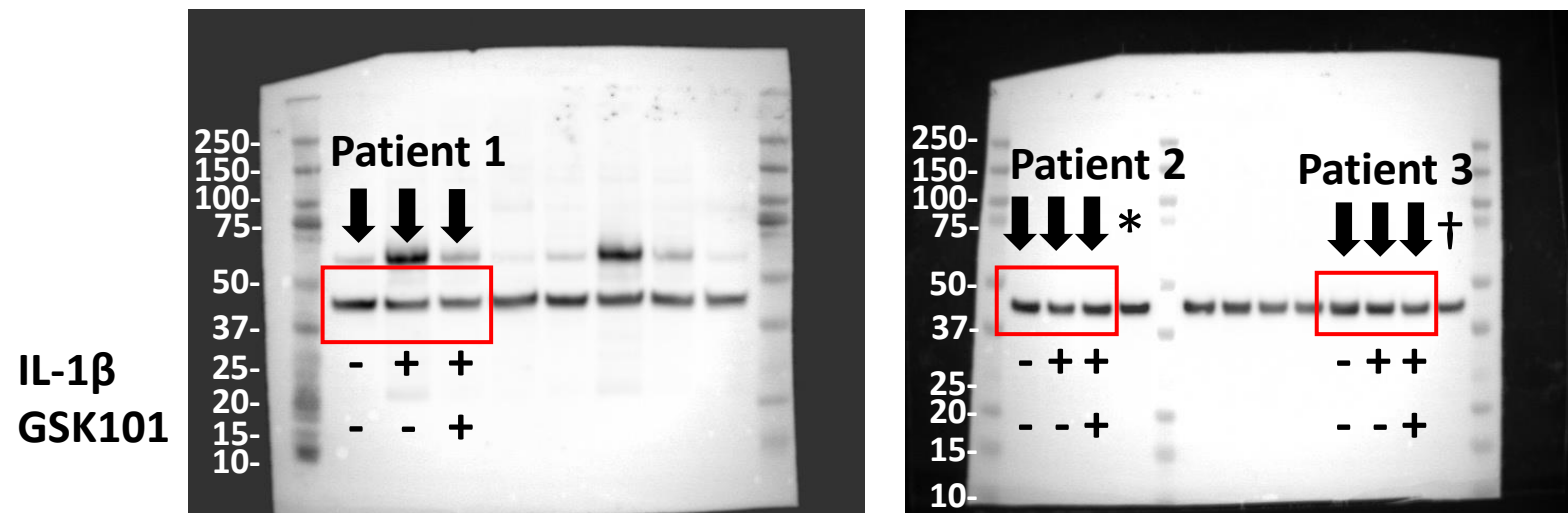

# Supplementary data 2

**Sample 1**

**Sample 2**

**Sample 3**

**Untreated control**

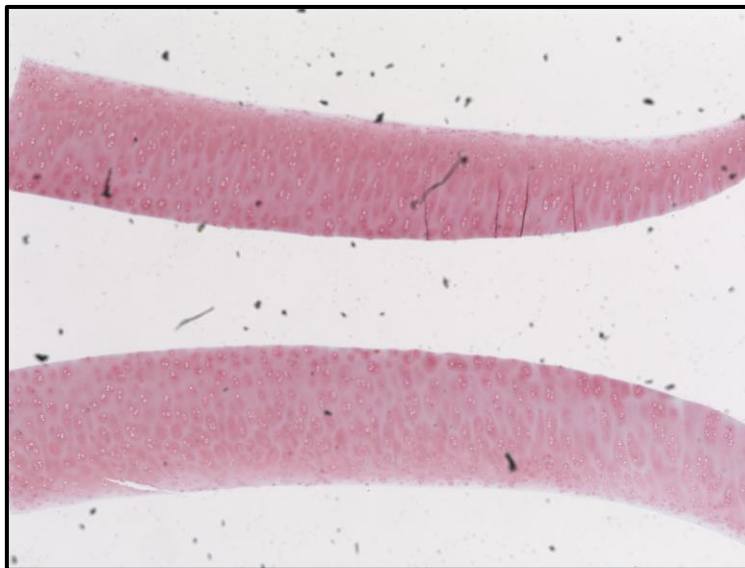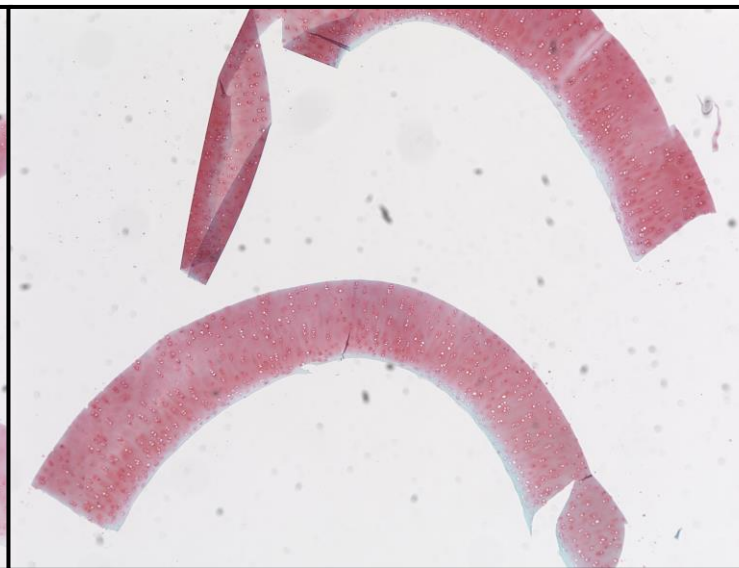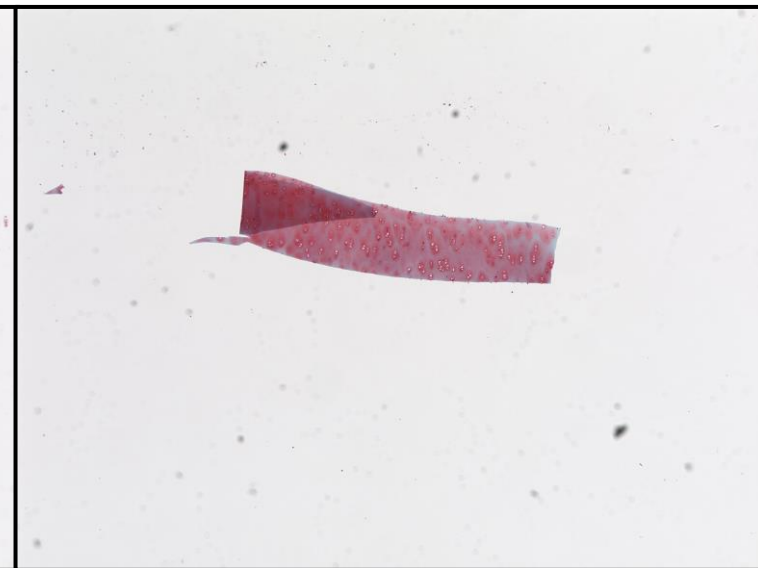

**Treated with GSK101**

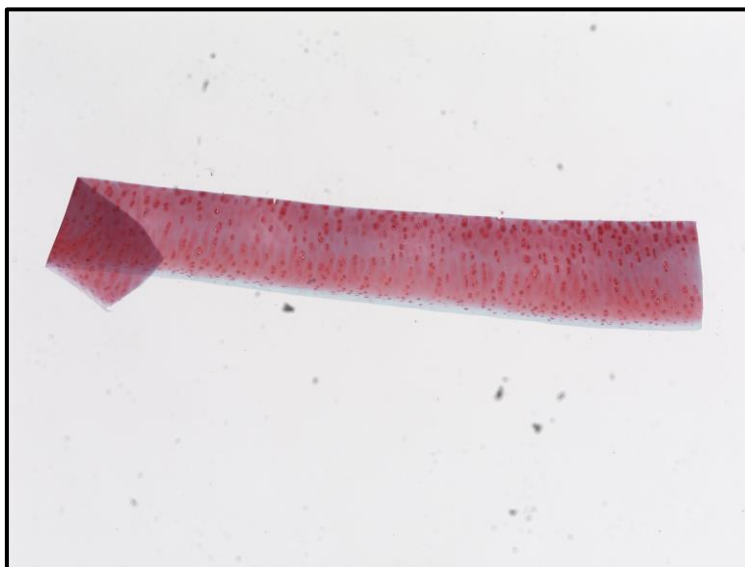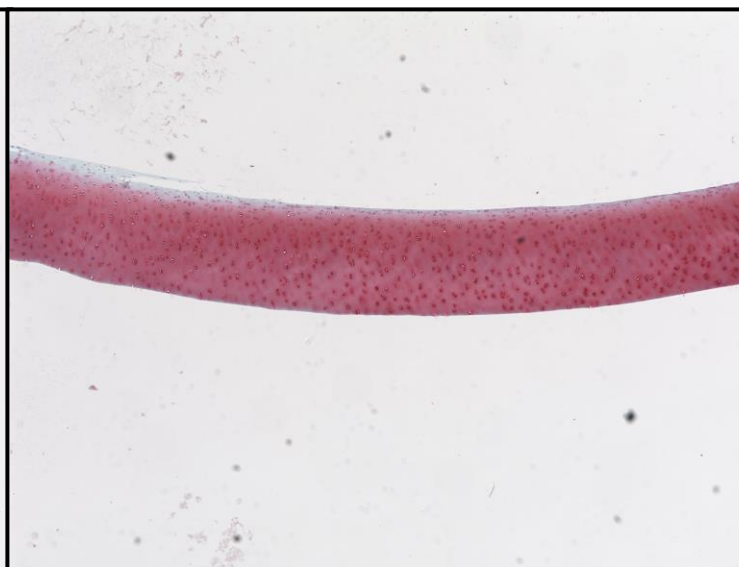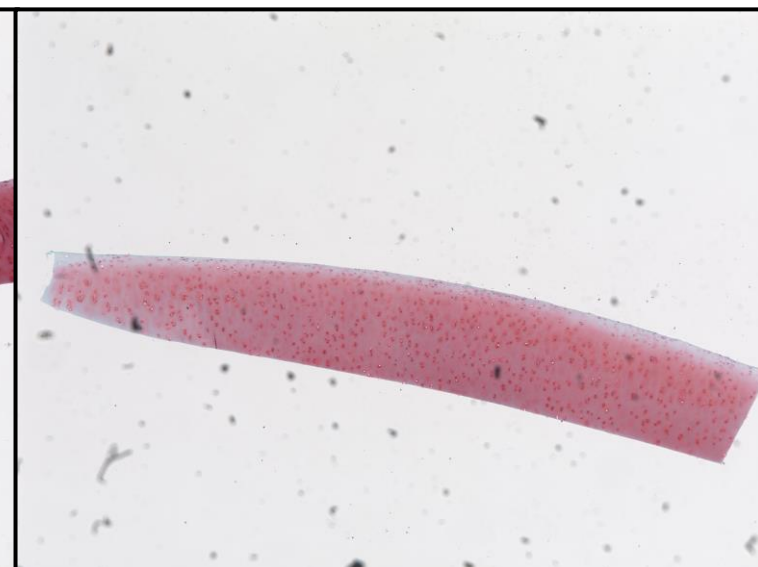

# Supplementary data 2 (continued)

**Sample 1**

**Sample 2**

**Sample 3**

**Treated with  
IL-1 $\beta$**

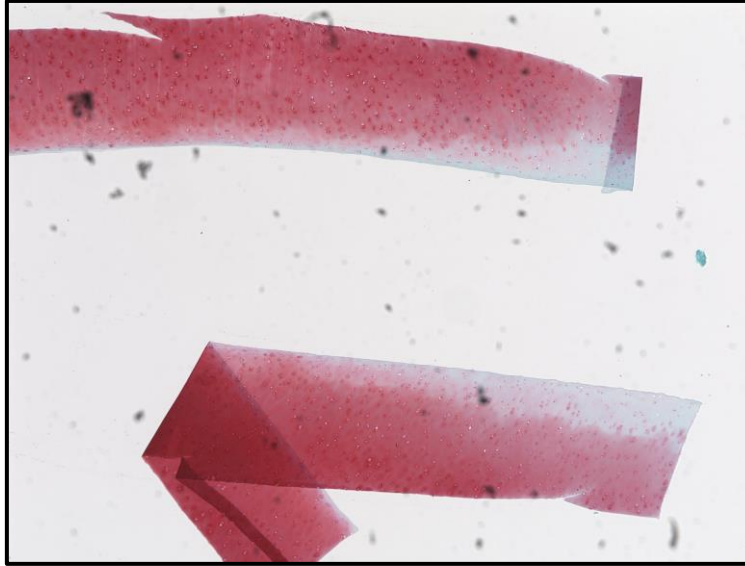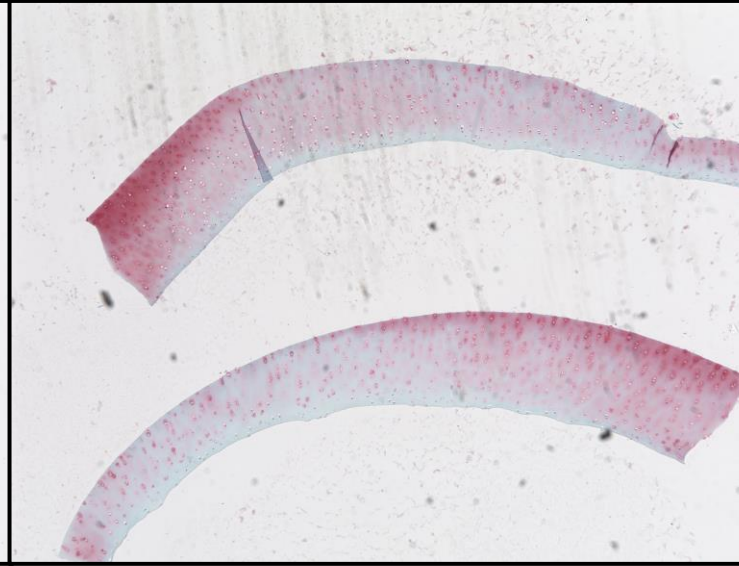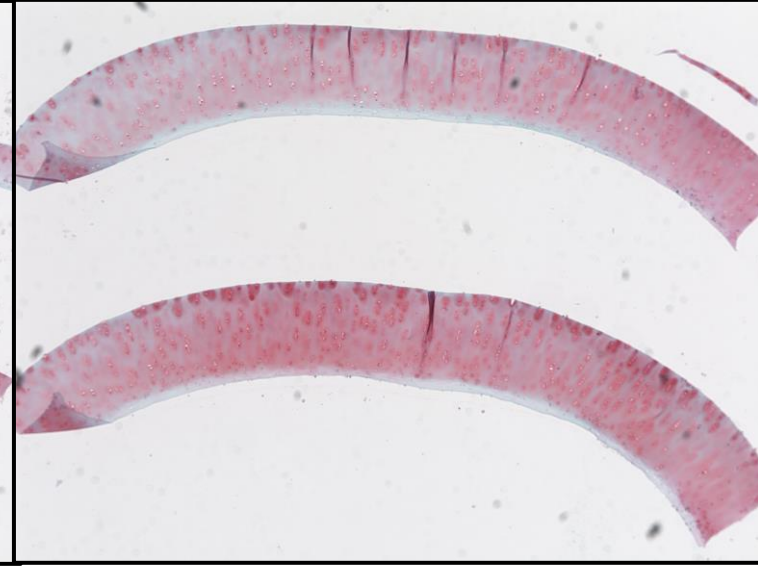

**Co-treated with  
IL-1 $\beta$  and GSK101**

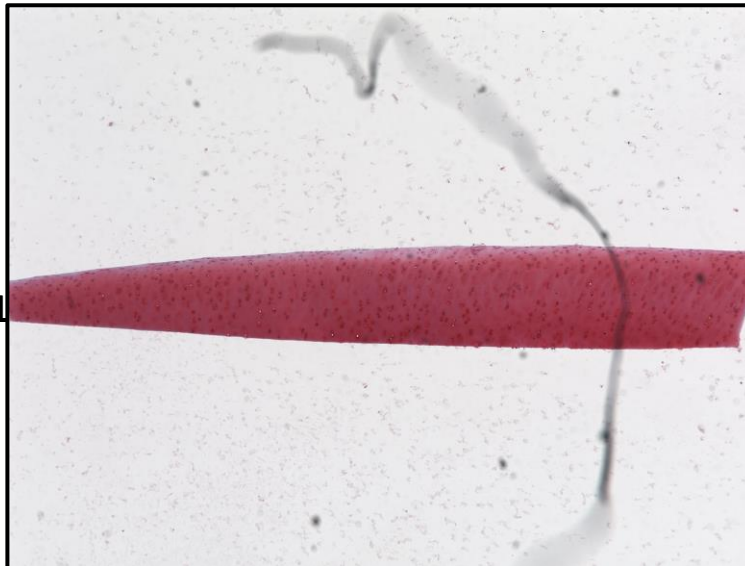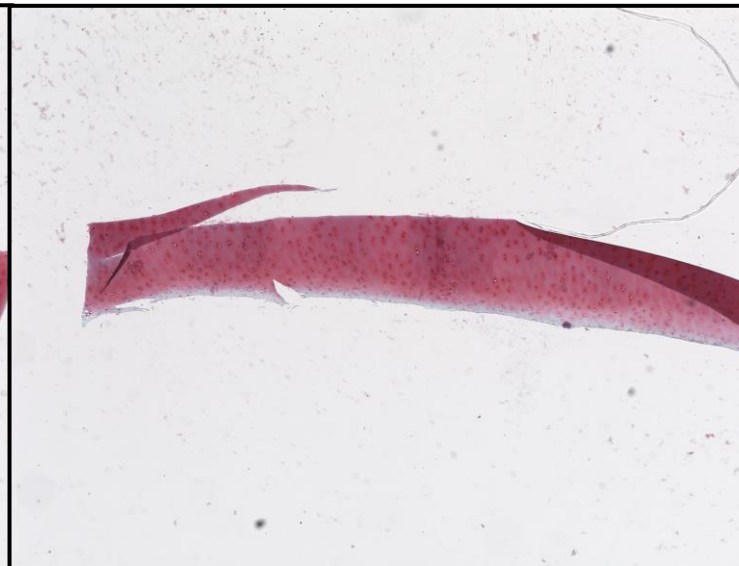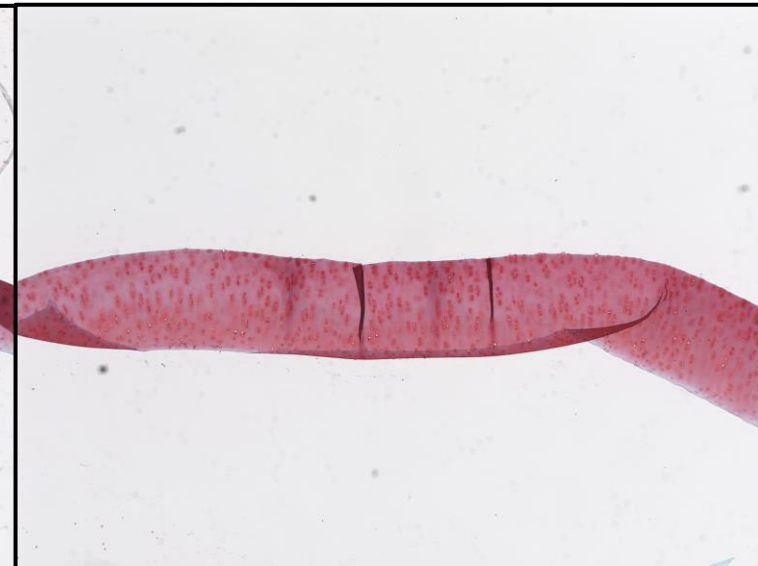

# Supplementary data 3(a)

Expression of pAMPK, tAMPK and  $\beta$ -actin in BACs in the Figure 3a

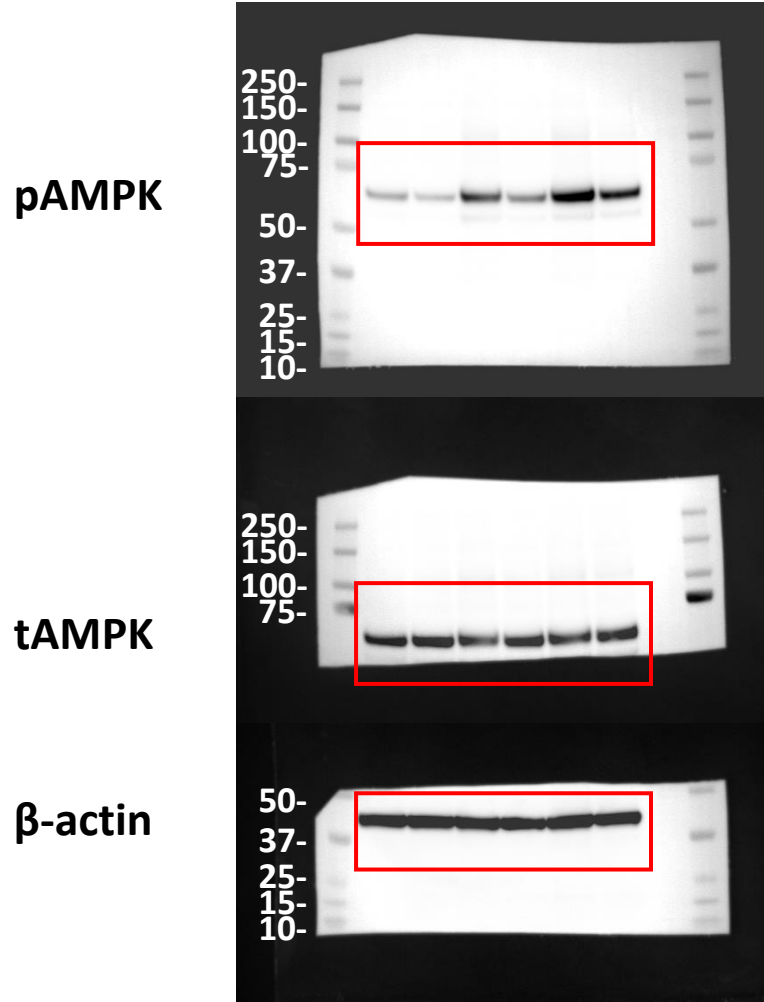

|              |   |   |   |   |   |   |
|--------------|---|---|---|---|---|---|
| IL-1 $\beta$ | - | - | - | + | + | + |
| GSK101       | - | - | + | - | + | + |
| Compound C   | - | + | - | - | - | + |

Expression of pNF $\kappa$ B, tNF $\kappa$ B and  $\beta$ -actin in BACs in the Figure 3a

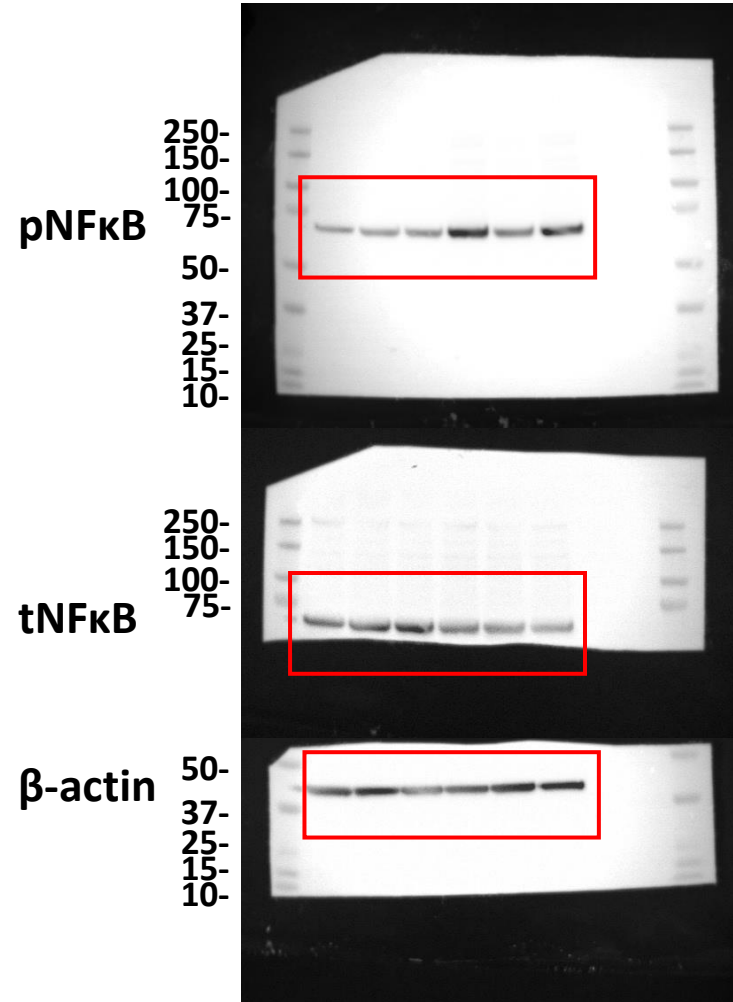

|              |   |   |   |   |   |   |
|--------------|---|---|---|---|---|---|
| IL-1 $\beta$ | - | - | - | + | + | + |
| GSK101       | - | - | + | - | + | + |
| Compound C   | - | + | - | - | - | + |

# Supplementary data 3(b)

Expression of pAMPK, tAMPK and  $\beta$ -actin in BACs in the Figure 3b

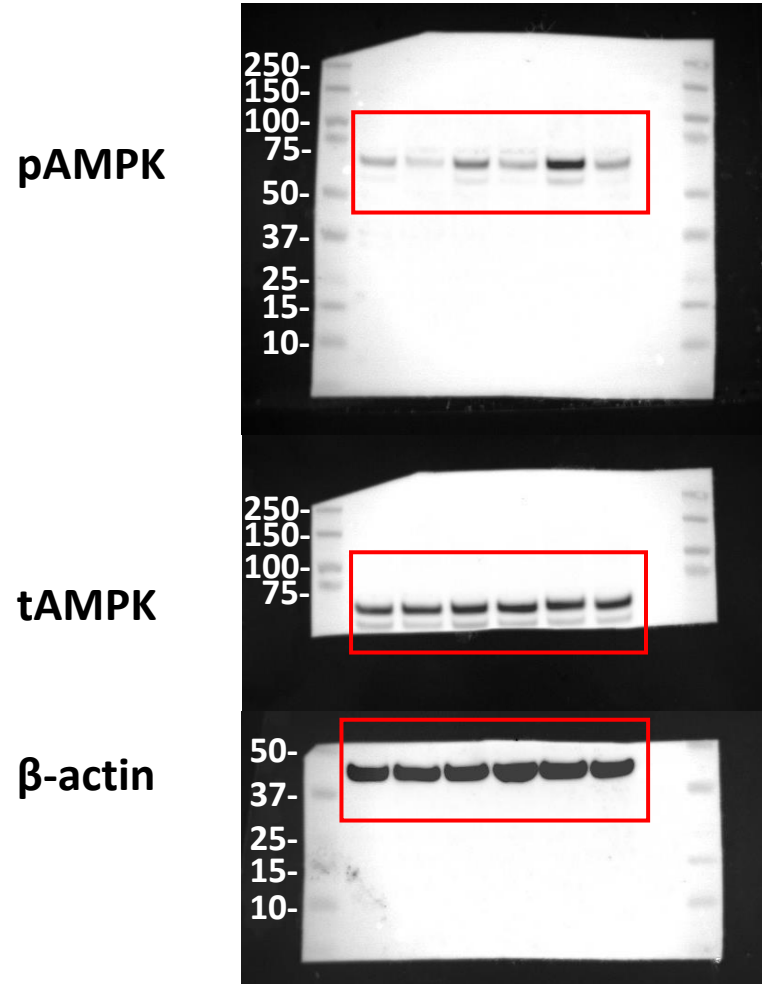

|              |   |   |   |   |   |   |
|--------------|---|---|---|---|---|---|
| IL-1 $\beta$ | - | - | - | + | + | + |
| GSK101       | - | - | + | - | + | + |
| STO-609      | - | + | - | - | - | + |

Expression of pNF $\kappa$ B, tNF $\kappa$ B and  $\beta$ -actin in BACs in the Figure 3b

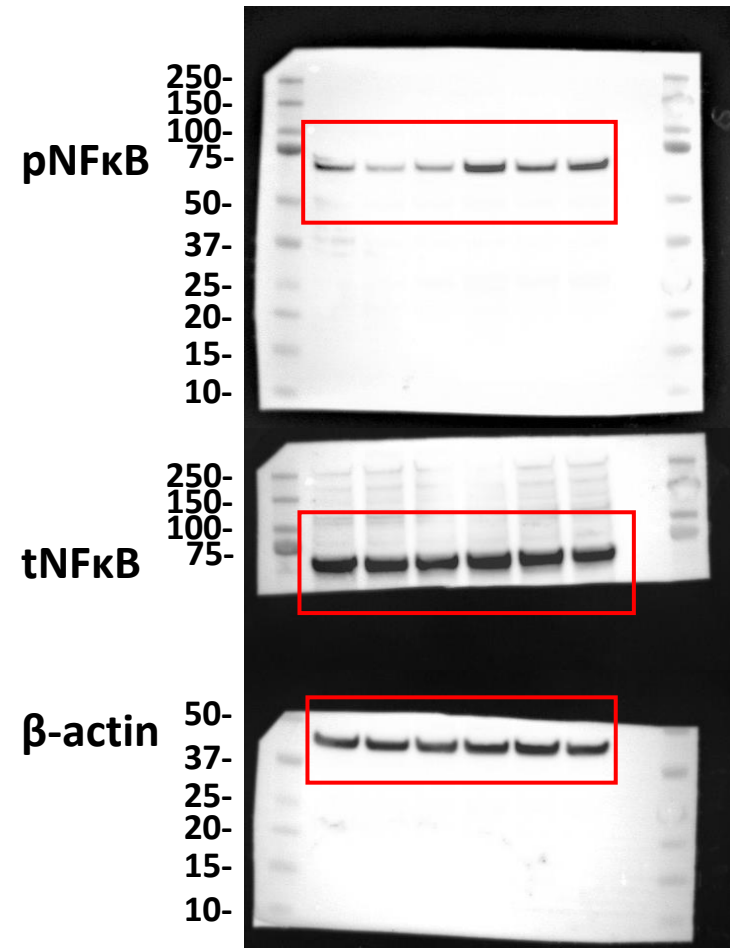

|  |   |   |   |   |   |   |
|--|---|---|---|---|---|---|
|  | - | - | - | + | + | + |
|  | - | - | + | - | + | + |
|  | - | + | - | - | - | + |

# Supplementary data 4

## Expression of MMP-13 in HACs in the Figure 4c

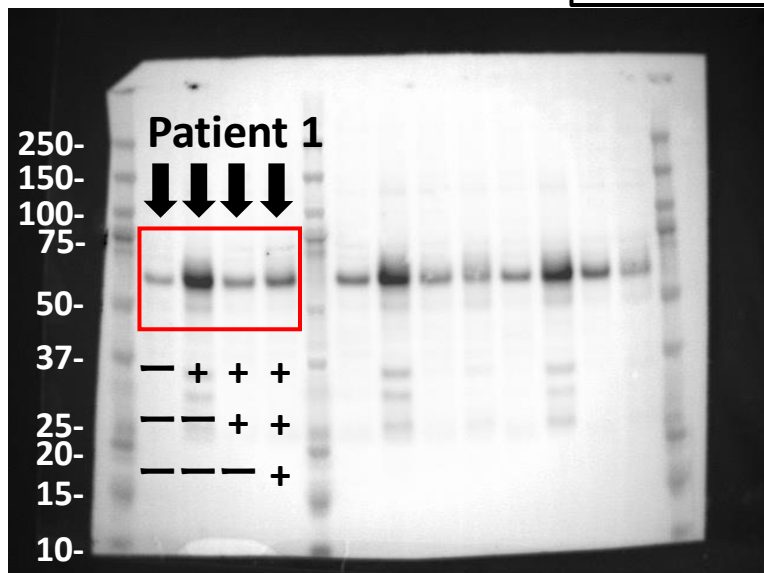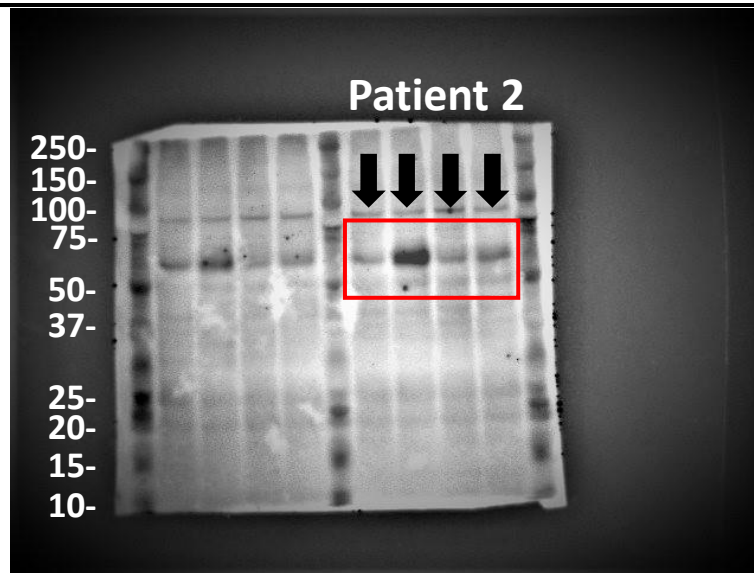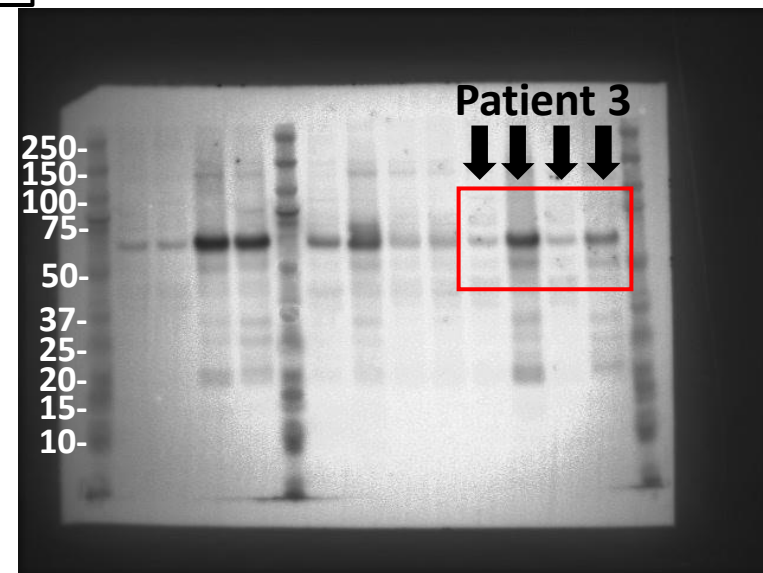

## Expression of $\beta$ -actin in HACs in the Figure 4c

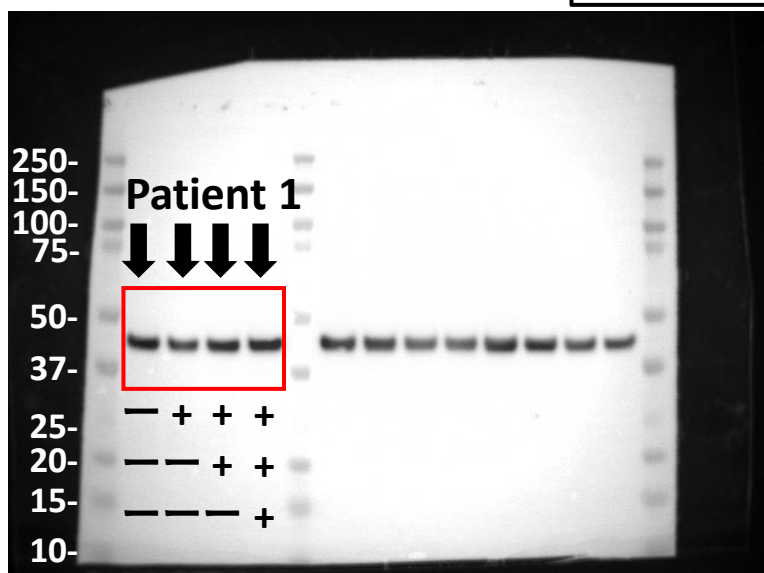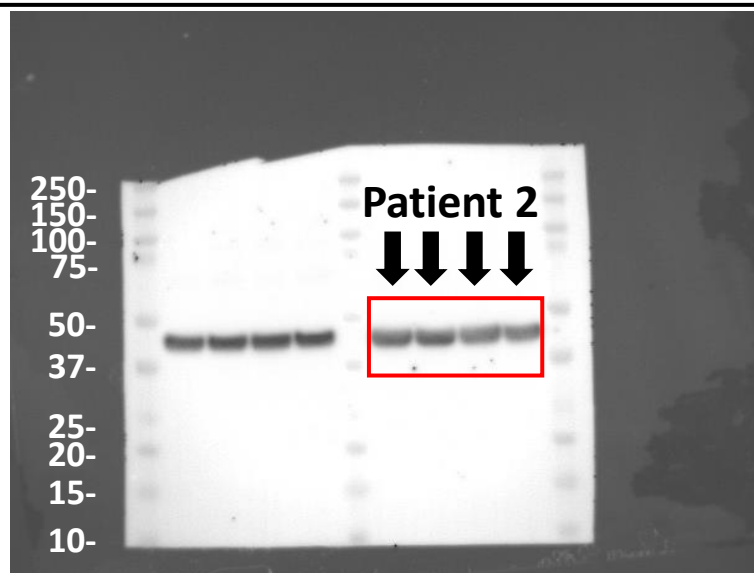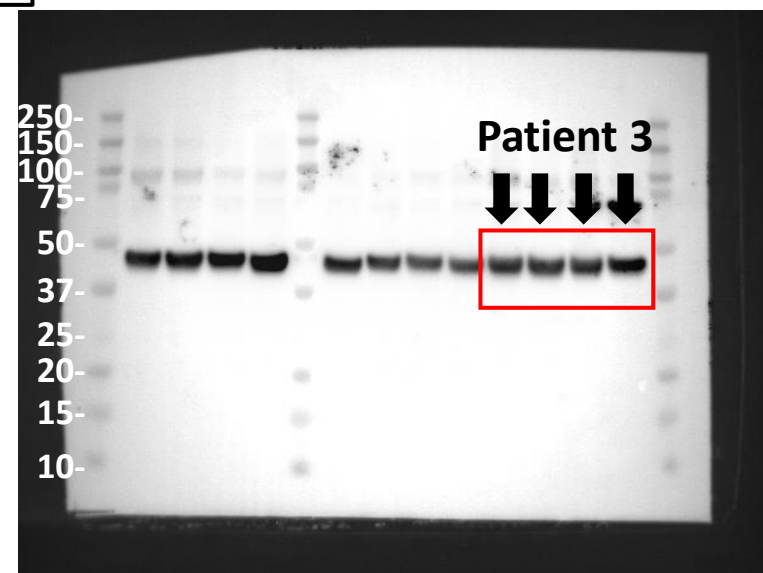

Supplementary data 1. Original membranes of MMP-13 and  $\beta$ -actin of Western blot analysis of Figure 2**b** in the manuscript using HACs from three patients. \*Co-treated with STO-609. †Co-treated with other agents which were not effective. HAC: human articular chondrocyte.

Supplementary data 2. Three replicates of explant culture of bovine articular cartilage tissue in Safranin O/Fast Green staining on day 7 in each group in Figure 2**d**. A substantial amount of proteoglycans was lost from explants treated with IL-1 $\beta$ , while this effect was almost completely rescued by co-treatment with IL-1 $\beta$  and GSK101.

Supplementary data 3. Original membranes of pAMPK and pNF $\kappa$ B of Western blot analysis of Figure 3 in the manuscript using BACs treated with IL-1 $\beta$ , GSK101 and (a) Compound C and (b) STO-609. BAC: bovine articular chondrocyte; p: phospho-; t: total-.

Supplementary data 4. Original membranes of MMP-13 of Western blot analysis of Figure 4c in the manuscript using HACs from three patients. HAC: human articular chondrocyte.
